# Supplementary material for: Mitochondrial Pyruvate Carrier Inhibition Attenuates Hepatic Stellate Cell Activation and Liver Injury in a Mouse Model of Metabolic Dysfunction-associated Steatotic Liver Disease
Source: PubMed Central journal article supplement — bioRxiv. 2023 Aug 25:2023.02.13.528384. Originally published 2023 Feb 14. Preprint. [Version 2] doi: 10.1101/2023.02.13.528384 (PMC9949033; doi:10.1101/2023.02.13.528384), 2023-08-25

# Supplementary Figure 1: No changes in plasma lipids Lrat-Mpc2<sup>-/-</sup> mice are protected from NASH-inducing diet

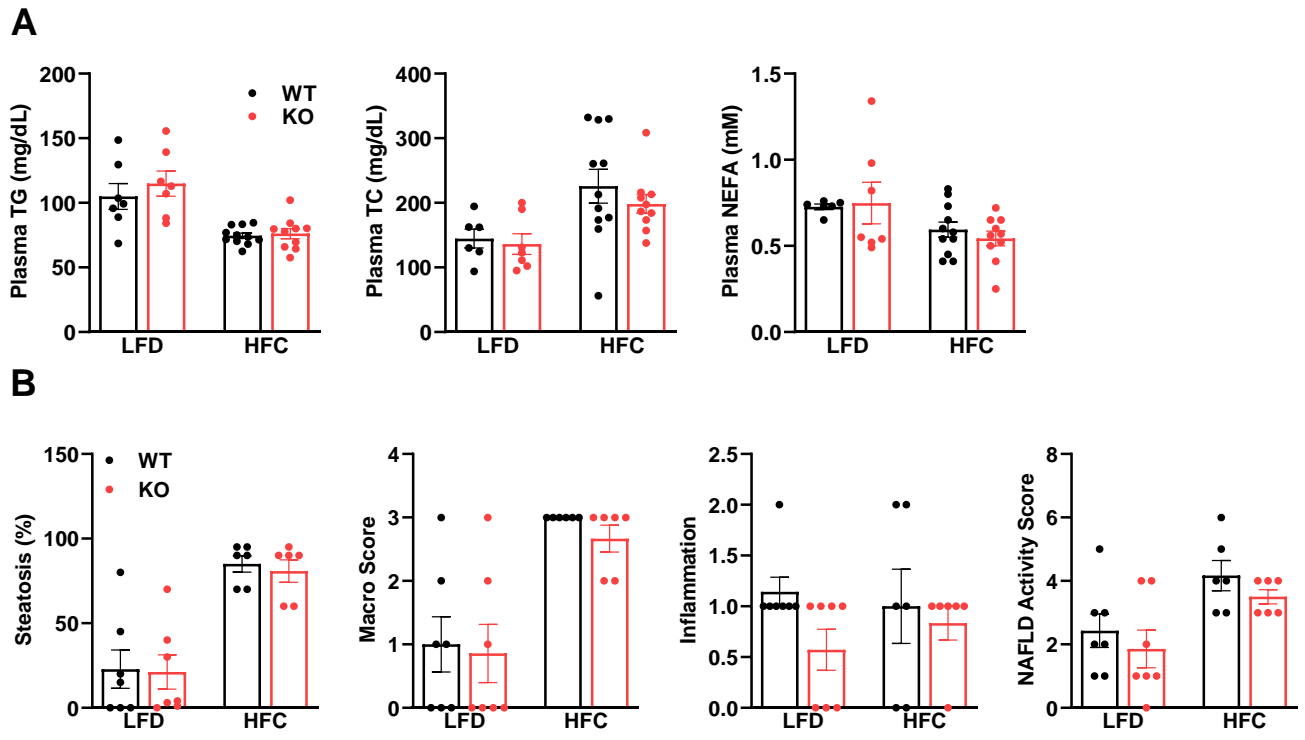

**Supplementary Figure 2:** Lean mass is similar between wild-type and Lrat-Mpc2<sup>-/-</sup> mice in thermoneutral housing.

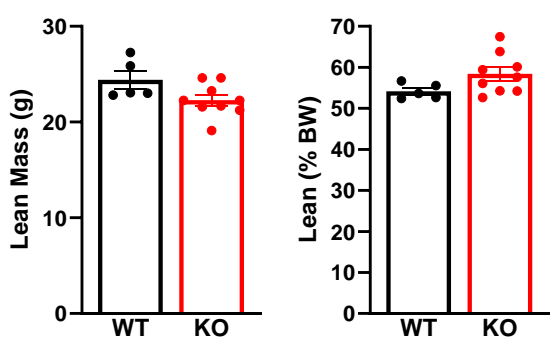

Supplement: media-1.pdf [file media-1.pdf]
